# Supplementary material
Source: MDPI journal article supplement (https://www.mdpi.com/2073-4441/10/10/1483)

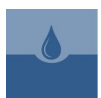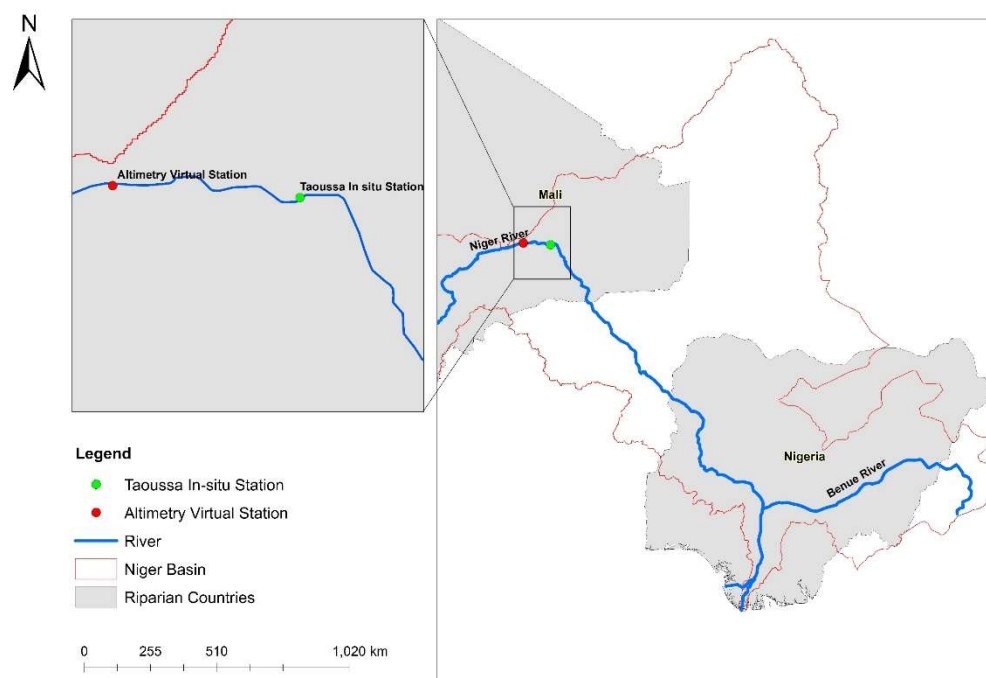

Supplementary Figure 1. Location of in situ Taoussa in relation to Altimetry virtual station

Supplement: s1 [file s1]
